# Supplementary material
Source: PubMed Central journal article supplement (PMC8770252)
Supplement: mmc1.pdf [file mmc1.pdf]

**Supplemental information**

**Salivary IgG to SARS-CoV-2 indicates  
seroconversion and correlates to serum neutralization  
in mRNA-vaccinated immunocompromised individuals**

**Katie Healy, Elisa Pin, Puran Chen, Gunnar Söderdahl, Piotr Nowak, Stephan Mielke, Lotta Hansson, Peter Bergman, C.I. Edvard Smith, Per Ljungman, Davide Valentini, Ola Blennow, Anders Österborg, Giorgio Gabarrini, Khaled Al-Manei, Hassan Alkharaan, Michał Jacek Sobkowiak, Jamil Yousef, Sara Mravinacova, Angelica Cuapio, Xinling Xu, Mira Akber, Karin Loré, Cecilia Hellström, Sandra Muschiol, Gordana Bogdanovic, Marcus Buggert, Hans-Gustaf Ljunggren, Sophia Hober, Peter Nilsson, Soo Aleman, and Margaret Sällberg Chen**

**Table S1.** Baseline characteristics of study participants and blood and saliva status, related to Figures 1-4.

| Group                                             | Healthy controls      | All patients            | PID                   | HIV                   | HSCT/<br>CAR-T        | SOT                   | CLL                   |
|---------------------------------------------------|-----------------------|-------------------------|-----------------------|-----------------------|-----------------------|-----------------------|-----------------------|
| <b>n after exclusion</b>                          | 82                    | 404                     | 79                    | 80                    | 74                    | 83                    | 88                    |
| <b>Sex, Men (%):<br/>Women (%)</b>                | 35 (43%):<br>47 (57%) | 217 (54%):<br>186 (46%) | 30 (38%):<br>49 (62%) | 47 (59%):<br>33 (41%) | 40 (54%):<br>33 (45%) | 42 (51%):<br>41 (49%) | 58 (66%):<br>30 (34%) |
| <b>Age (years)<br/>[median, IQR]</b>              | 54<br>(34-67)         | 60<br>(47-69)           | 50<br>(37-59)         | 54<br>(42-63)         | 60<br>(51-67)         | 59<br>(47-67)         | 70<br>(62-76)         |
| <b>Blood parameters§<br/>[median, IQR]</b>        |                       |                         |                       |                       |                       |                       |                       |
| IgG (g/L)                                         | 11 (10-13)            | 10 (9-12)               | 13 (10-15)            | 10 (7-12)             | 10 (7-11)             | 6.50 (5-10)           | 10 (9-12)             |
| Absolute lymphocyte count (x10 <sup>9</sup> /L)   | 1.60<br>(1.10-2.40)   | 1.3<br>(0.9-1.60)       | 1.8<br>(1.4-2.30)     | 1.6<br>(1-2.70)       | 1.3<br>(0.88-1.70)    | 5.9<br>(1.6-22)       | 1.60<br>(1.10-2.40)   |
| Creatinine (µmol/L)                               | 70.50<br>(63-81)      | 80<br>(65-95)           | 66<br>(57-79)         | 83.5<br>(67-99)       | 79<br>(62-91)         | 98<br>(79-119)        | 80<br>(67-88)         |
| <b>Ongoing immunosuppression, n (%)</b>           |                       |                         |                       |                       |                       |                       |                       |
| Corticosteroids                                   | 0 (0%)                | 94 (23%)                | 9 (11%)               | 0 (0%)                | 9 (12%)               | 76 (92%)              | 0 (0%)                |
| Other immunosuppressive agents                    | 0 (0%)                | 144 (36%)               | 12 (15%)              | 0 (0%)                | 18 (26%)              | 83 (100%)             | 30 (34%)              |
| <b>Systemic IgG substitution, n (%)</b>           | 0 (0%)                | 51 (13%)                | 51 (65%)              | 0 (0%)                | 0 (0%)                | 0 (0%)                | 0 (0%)                |
| <b>Saliva flow rate (mL/min) [median, IQR] §§</b> |                       |                         |                       |                       |                       |                       |                       |
| D0                                                | 0.59<br>(0.4-0.7)     | 0.56<br>(0.4-0.7)       | 0.54<br>(0.4-0.7)     | 0.55<br>(0.4-0.7)     | 0.66<br>(0.5-0.8)     | 0.56<br>(0.4-0.8)     | 0.46<br>(0.2-0.7)     |
| D10                                               | 0.60<br>(0.4-0.8)     | 0.62<br>(0.4-0.8)       | 0.60<br>(0.3-0.8)     | 0.64<br>(0.4-0.8)     | 0.63<br>(0.4-0.8)     | 0.68<br>(0.5-0.8)     | 0.59<br>(0.4-0.8)     |
| D21                                               | 0.60<br>(0.5-0.7)     | 0.58<br>(0.4-0.7)       | 0.55<br>(0.4-0.7)     | 0.60<br>(0.4-0.8)     | 0.66<br>(0.5-0.8)     | 0.60<br>(0.4-0.7)     | 0.45<br>(0.3-0.7)     |
| D35                                               | 0.66<br>(0.4-0.8)     | 0.60<br>(0.4-0.8)       | 0.54<br>(0.3-0.8)     | 0.62<br>(0.5-0.8)     | 0.62<br>(0.4-0.8)     | 0.62<br>(0.4-0.8)     | 0.53<br>(0.3-0.7)     |

§ Measured at treatment initiation

§§ Number of days after vaccine dose 1.

Abbreviations: n = number; PID = primary immunodeficiency disorders; HIV = human immunodeficiency virus; HSCT = hematopoietic stem cell transplantation; SOT = solid organ transplantation; CLL = chronic lymphocytic leukemia; IgG = immunoglobulin G; CAR-T = chimeric antigen receptor T-cell therapy.

**Table S2.** Correlations between salivary spike IgG MFI and serum IgG spike S1 RBD IgG IU/ml in D35 saliva samples, related to Figure 2.

| Ab specificity   | Spike-f      |         | S1           |         |
|------------------|--------------|---------|--------------|---------|
|                  | Spearman rho | p-value | Spearman rho | p-value |
| Healthy Controls | 0.4290       | <0.0001 | 0.4303       | <0.0001 |
| PID              | 0.8500       | <0.0001 | 0.8247       | <0.0001 |
| HIV              | 0.3886       | 0.0006  | 0.4025       | 0.0004  |
| HSCT/CAR-T       | 0.8331       | <0.0001 | 0.8359       | <0.0001 |
| SOT              | 0.7582       | <0.0001 | 0.6660       | <0.0001 |
| CLL              | 0.6951       | <0.0001 | 0.7344       | <0.0001 |

Abbreviations: n = number, PID: primary immunodeficiency disorders, HIV: human immunodeficiency virus, HSCT: hematopoetic stem cell transplantation, SOT: solid organ transplantation, CLL: chronic lymphocytic leukemia, IgG: immunoglobulin G, CAR-T: chimeric antigen receptor T-cell therapy. Spearman correlation analysis was performed.

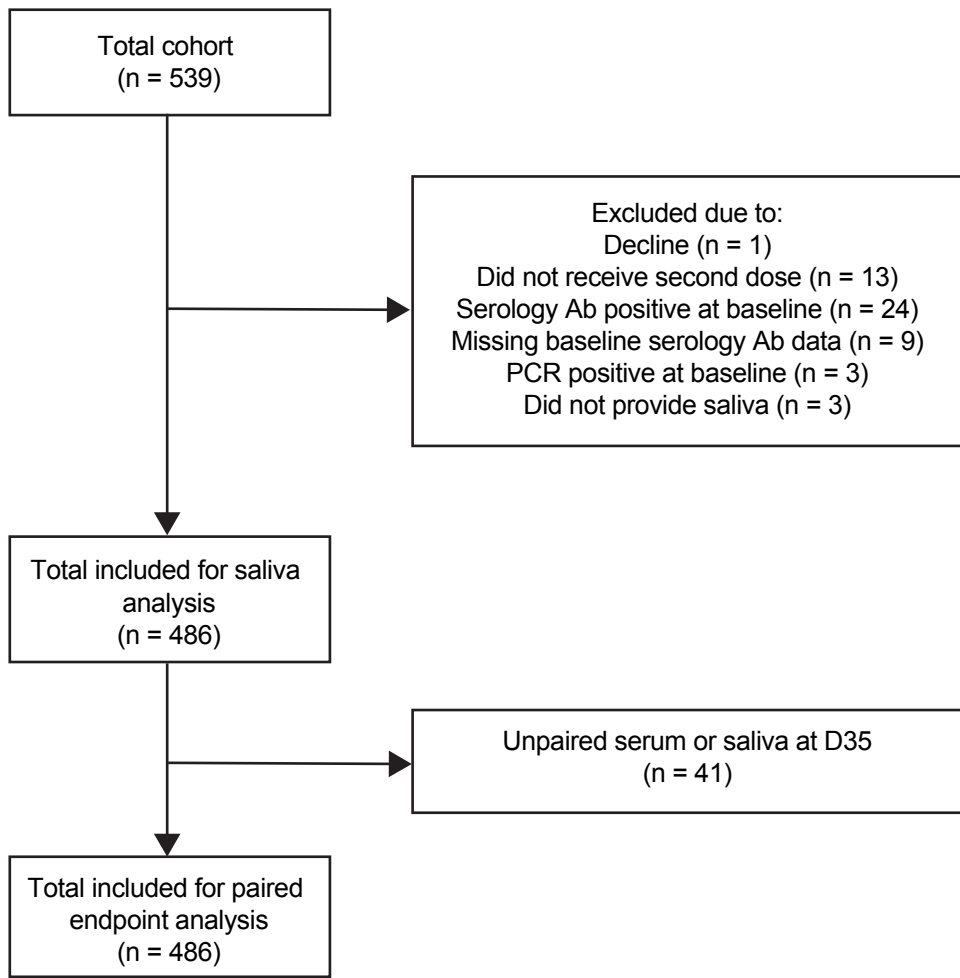

**Figure S1: Flow chart of the study design, related to Figure 1.**

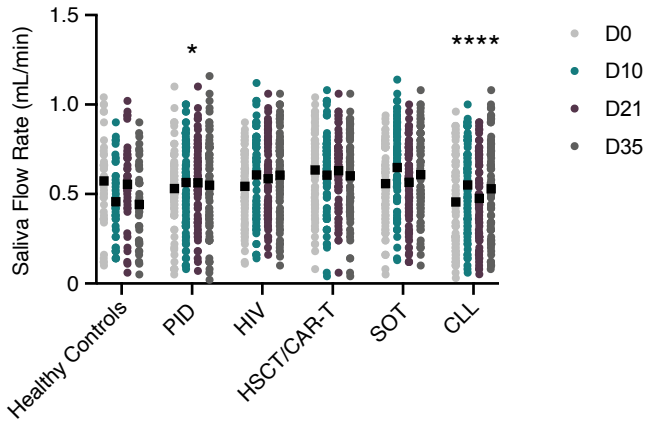

**Figure S2: Saliva flow rate for the COVAXID cohort at each timepoint, related Figure 1.** The Mann-Whitney U test was used to test significance. \*\*\*\*  $p < 0.0001$ , \*\*\*  $p < 0.0002$ , \*\*  $p < 0.0021$ , \*  $p < 0.0332$ . ns = not significant.

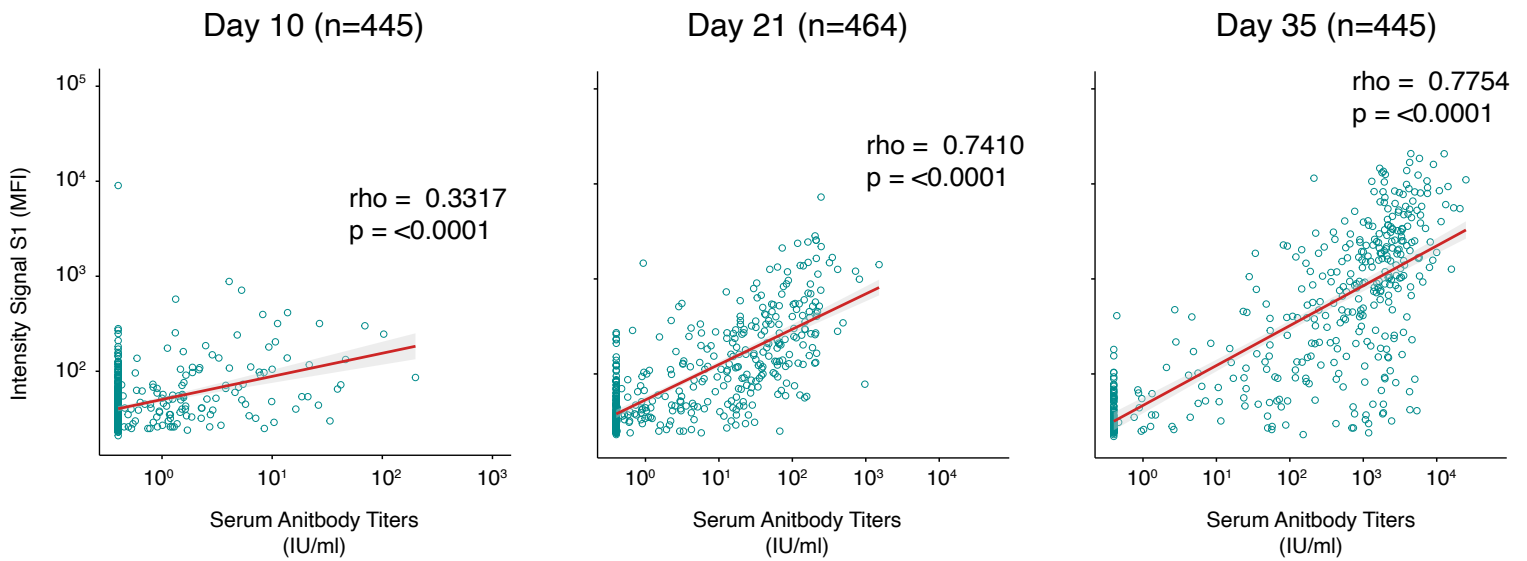

**Figure S3: Correlation between spike IgG in paired serum and saliva, related to Figure 2.** Salivary S1 IgG MFI signal intensity (y-axis) was measured by a multiplex bead-based assay, and serum SARS-CoV-2 spike IgG levels expressed as international units (x-axis) were measured by the quantitative test Elecsys® Anti-SARS-CoV-2 S. Correlation plots of the entire COVAXID cohort at D10, D21, and D35 post-vaccination. MFI = Median Fluorescence Intensity; IU = International Units. Spearman correlation analysis was used to determine rho- and p-values.

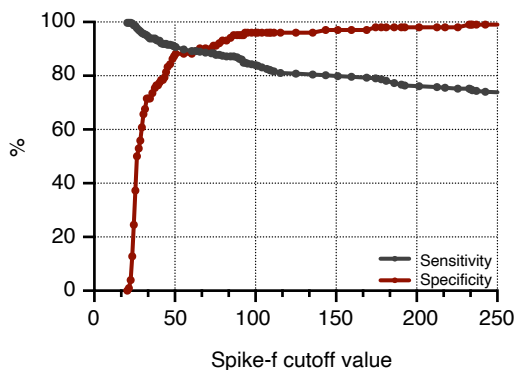

**Figure S4: Sensitivity and specificity plot of salivary SARS-CoV-2 Spike-f responses based on optimal cut-off calculation, related to Figure 5.**
